# Supplementary material
Source: HighWire-hosted journal article supplement (https://bmjopen.bmj.com/content/12/3/e056598)
Supplement: inline-supplementary-material-2 [file inline-supplementary-material-2.pdf]

**Record linkage studies of drug-related deaths among former adult prisoners who have been released to the community: a scoping review protocol**Cooper JA <sup>1,2\*</sup>, Onyeka IN <sup>1,2</sup>, O'Reilly D <sup>1,2</sup>, Kirk R <sup>3</sup>, Donnelly M <sup>1,2</sup><sup>1</sup> Centre for Public Health, Queen's University Belfast, Royal Hospitals Site, Grosvenor Road, Belfast, UK<sup>2</sup> Administrative Data Research Centre Northern Ireland (ADRC NI), Centre for Public Health, Queen's University Belfast, Royal Hospitals Site, Grosvenor Road, Belfast, UK<sup>3</sup> South Eastern Health and Social Care Trust, Ulster Hospital, Dundonald, UK

\*corresponding author

**DATA CHARTING FORM**

|                                                 |                      |                       |
|-------------------------------------------------|----------------------|-----------------------|
| <b>Study assessor initials</b>                  |                      |                       |
| <b>Date of completion of data charting form</b> |                      |                       |
|                                                 |                      |                       |
| <b>Item</b>                                     | <b>Notes on item</b> | <b>Data extracted</b> |
| <b>Study reference number</b>                   |                      |                       |
| <b>Study assessment number</b>                  |                      |                       |
| <b>Lead author</b>                              |                      |                       |

|                                  |                                                                                     |  |
|----------------------------------|-------------------------------------------------------------------------------------|--|
|                                  |                                                                                     |  |
| <b>Title</b>                     |                                                                                     |  |
| <b>Year of publication</b>       |                                                                                     |  |
| <b>Origin, country of origin</b> |                                                                                     |  |
| <b>Journal name</b>              |                                                                                     |  |
| <b>Study design</b>              |                                                                                     |  |
| <b>Citation</b>                  |                                                                                     |  |
| <b>Setting</b>                   | <i>Stated setting</i>                                                               |  |
|                                  | <i>Stated locations</i>                                                             |  |
|                                  | <i>Stated relevant dates</i>                                                        |  |
| <b>Participants</b>              | <i>Stated study population</i>                                                      |  |
|                                  | <i>Stated type of prison</i>                                                        |  |
|                                  | <i>Stated age inclusions (or any stated age exclusions)</i>                         |  |
|                                  | <i>Stated gender inclusions</i>                                                     |  |
|                                  | <i>Stated race/ethnicity inclusions</i>                                             |  |
|                                  | <i>Stated methods of study population selection (type of prisoner data records)</i> |  |
|                                  | <i>Stated methods of follow-up (for example, record linkage or interview)</i>       |  |

|                            |                                                                                                        |  |
|----------------------------|--------------------------------------------------------------------------------------------------------|--|
|                            | <i>Stated rationale for the choice of cases and controls (case-control study only)</i>                 |  |
|                            | <i>Stated matching criteria (case-control study only)</i>                                              |  |
|                            | <i>Stated number of controls per case (case-control study only)</i>                                    |  |
| <b>Data sources</b>        | <i>Stated sources of data</i>                                                                          |  |
|                            | <i>Stated sources of comparator data</i>                                                               |  |
| <b>Bias</b>                | <i>Stated bias</i>                                                                                     |  |
|                            | <i>Stated efforts to address potential sources of bias</i>                                             |  |
|                            | <i>Stated methods for dealing with repeated incarcerations?</i>                                        |  |
| <b>Study size</b>          | <i>Stated study size</i>                                                                               |  |
| <b>Statistical methods</b> | <i>Stated statistical methods</i>                                                                      |  |
|                            | <i>Stated methods controlling for confounders and methods for examining subgroups and interactions</i> |  |
|                            | <i>Stated sensitivity analyses</i>                                                                     |  |
|                            | <i>Stated time period examined after prison release</i>                                                |  |
|                            | <i>Stated how missing data was addressed</i>                                                           |  |

|                      |                                                                                                                                                                                                                                                                                                                                                                                |  |
|----------------------|--------------------------------------------------------------------------------------------------------------------------------------------------------------------------------------------------------------------------------------------------------------------------------------------------------------------------------------------------------------------------------|--|
|                      |                                                                                                                                                                                                                                                                                                                                                                                |  |
|                      | <i>Stated how loss to follow-up was addressed</i>                                                                                                                                                                                                                                                                                                                              |  |
|                      | <i>Stated how matching of case and controls was addressed (case-control study only)</i>                                                                                                                                                                                                                                                                                        |  |
| <b>Linkage</b>       | <i>Stated linkage i.e. if person-level, institution-level or other data linkage across two or more databases</i>                                                                                                                                                                                                                                                               |  |
|                      | <i>Stated types of linked databases</i>                                                                                                                                                                                                                                                                                                                                        |  |
|                      | <i>Stated methods of linkage</i>                                                                                                                                                                                                                                                                                                                                               |  |
| <b>Main outcomes</b> | <i>Stated outcome events or summary measures<br/>(include information on specific drugs)</i>                                                                                                                                                                                                                                                                                   |  |
| <b>Main results</b>  | <p><i>Stated unadjusted estimate and, if applicable, confounder adjusted estimates, their precision, which confounders were adjusted for.</i></p> <p><i>Reported for all cause and drug-related deaths</i></p> <p><i>For example, include crude mortality rates, standardised mortality ratios etc.</i></p> <p><i>Include reported for age, gender, race/ethnicity etc</i></p> |  |

|                                                  |                                                                                                                       |  |
|--------------------------------------------------|-----------------------------------------------------------------------------------------------------------------------|--|
|                                                  | <i>Stated age at release (mean/median/SD/range)</i>                                                                   |  |
|                                                  | <i>Stated length of incarceration (mean/median/SD/range)</i>                                                          |  |
| <b>Limitations</b>                               | <i>Stated limitations of study including sources of potential bias or imprecision (are the results generalisable)</i> |  |
| <b>Quality assessment checklist or technique</b> | <i>Stated if quality assessment checklist or technique was used</i>                                                   |  |
